# Supplementary material
Source: PubMed Central journal article supplement (PMC5818067)
Supplement: heartasia-2017-010893supp001.pdf [file heartasia-2017-010893supp001.pdf]

**Supplementary Table: Effect of different simulated scenarios on the D:A:D score corresponding to a 50% cumulative CVD risk**

|                                                             | <b>Overall</b>                                                  | <b>Male</b> | <b>Female</b> |
|-------------------------------------------------------------|-----------------------------------------------------------------|-------------|---------------|
|                                                             | <b>D:A:D score corresponding to 50% cumulative CVD risk (%)</b> |             |               |
| <b>Actual data</b>                                          | 2.19                                                            | 2.62        | 0.89          |
| <b>Low HDL raised to 1mmol/L</b>                            | 2.05                                                            | 2.51        | 0.86          |
| <b>High total cholesterol reduced to 5.2mmol/L</b>          | 2.03                                                            | 2.51        | 0.82          |
| <b>Low CD4 counts raised to 500 cells/<math>\mu</math>L</b> | 1.90                                                            | 2.41        | 0.86          |
| <b>High systolic blood pressure lowered to 130 mm Hg</b>    | 1.90                                                            | 2.35        | 0.80          |
| <b>Smoking prevention</b>                                   | 1.90                                                            | 2.27        | 0.89          |
| <b>Diabetes prevention</b>                                  | 1.84                                                            | 2.19        | 0.77          |
| <b>Optimal (combination of all scenarios above)</b>         | 1.23                                                            | 1.58        | 0.65          |
